# Supplementary material for: New hybrid: [H-β-(4-pyridyl)-Ala-OH] tetrafluoroborate – crystal structure and strong piezoelectricity
Source: Royal Society of Chemistry journal article supplement (doi:10.1039/d3ce00308f), 2023-01-01
Supplement: d3ce00308f1.pdf [file d3ce00308f1.pdf]

## New hybrid: [H-β-(4-Pyridyl)-Ala-OH] tetrafluoroborate - crystal structure and strong piezoelectricity

Maciej Wojtaś,<sup>\*a</sup> Tamara J. Bednarchuk,<sup>b</sup> and Igor Bdkin<sup>c</sup>

### Supplementary Information

Table S1 Geometric parameters (Å, °) for [4PyAla][BF<sub>4</sub>].

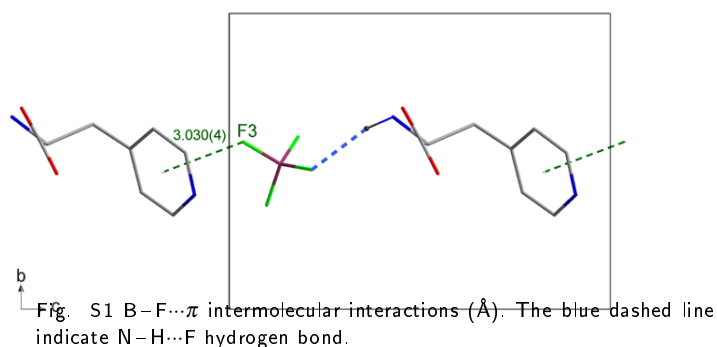

|                 |           |                 |            |
|-----------------|-----------|-----------------|------------|
| O2-C1           | 1.248 (4) | C2-H2           | 1          |
| O1-C1           | 1.255 (4) | C2-C3           | 1.548 (5)  |
| F1-B1           | 1.385 (6) | N11-H11         | 0.88       |
| F2-B1           | 1.375 (6) | N11-C16         | 1.355 (6)  |
| N1-H1A          | 0.91      | N11-C12         | 1.340 (6)  |
| N1-H1B          | 0.91      | C3-H3A          | 0.99       |
| N1-H1C          | 0.91      | C3-H3B          | 0.99       |
| N1-C2           | 1.491 (4) | C13-H13         | 0.95       |
| F3-B1           | 1.394 (6) | C13-C12         | 1.371 (6)  |
| F4-B1           | 1.372 (6) | C15-H15         | 0.95       |
| C1-C2           | 1.534 (5) | C15-C16         | 1.364 (6)  |
| C14-C3          | 1.503 (5) | C16-H16         | 0.95       |
| C14-C13         | 1.396 (5) | C12-H12         | 0.95       |
| C14-C15         | 1.387 (5) |                 |            |
| H1A-N1-H1B      | 109.5     | C14-C3-H3B      | 109.5      |
| H1A-N1-H1C      | 109.5     | C2-C3-H3A       | 109.5      |
| H1B-N1-H1C      | 109.5     | C2-C3-H3B       | 109.5      |
| C2-N1-H1A       | 109.5     | H3A-C3-H3B      | 108.1      |
| C2-N1-H1B       | 109.5     | C14-C13-H13     | 119.9      |
| C2-N1-H1C       | 109.5     | C12-C13-C14     | 120.3 (4)  |
| O2-C1-O1        | 125.9 (3) | C12-C13-H13     | 119.9      |
| O2-C1-C2        | 117.3 (3) | C14-C15-H15     | 119.8      |
| O1-C1-C2        | 116.7 (3) | C16-C15-C14     | 120.5 (4)  |
| C13-C14-C3      | 120.7 (3) | C16-C15-H15     | 119.8      |
| C15-C14-C3      | 121.6 (3) | N11-C16-C15     | 120.4 (4)  |
| C15-C14-C13     | 117.6 (4) | N11-C16-H16     | 119.8      |
| N1-C2-C1        | 109.7 (3) | C15-C16-H16     | 119.8      |
| N1-C2-H2        | 109.7     | N11-C12-C13     | 120.4 (4)  |
| N1-C2-C3        | 107.6 (3) | N11-C12-H12     | 119.8      |
| C1-C2-H2        | 109.7     | C13-C12-H12     | 119.8      |
| C1-C2-C3        | 110.5 (3) | F1-B1-F3        | 109.5 (4)  |
| C3-C2-H2        | 109.7     | F2-B1-F1        | 110.3 (4)  |
| C16-N11-H11     | 119.6     | F2-B1-F3        | 108.0 (4)  |
| C12-N11-H11     | 119.6     | F4-B1-F1        | 109.1 (4)  |
| C12-N11-C16     | 120.8 (4) | F4-B1-F2        | 113.0 (5)  |
| C14-C3-C2       | 110.8 (3) | F4-B1-F3        | 106.8 (4)  |
| C14-C3-H3A      | 109.5     |                 |            |
| O2-C1-C2-N1     | 156.6 (3) | C3-C14-C13-C12  | 175.5 (4)  |
| O2-C1-C2-C3     | -84.9 (4) | C3-C14-C15-C16  | -175.4 (4) |
| O1-C1-C2-N1     | -26.5 (4) | C13-C14-C3-C2   | -106.6 (4) |
| O1-C1-C2-C3     | 92.0 (4)  | C13-C14-C15-C16 | 1.4 (5)    |
| N1-C2-C3-C14    | 177.4 (3) | C15-C14-C3-C2   | 70.1 (4)   |
| C1-C2-C3-C14    | 57.7 (4)  | C15-C14-C13-C12 | -1.3 (5)   |
| C14-C13-C12-N11 | -0.1 (6)  | C16-N11-C12-C13 | 1.4 (6)    |
| C14-C15-C16-N11 | -0.1 (6)  | C12-N11-C16-C15 | -1.3 (6)   |

<sup>a</sup> Faculty of Chemistry, University of Wrocław, 14 Joliot-Curie, 50-383 Wrocław, Poland; E-mail: maciej.wojtas@uwr.edu.pl

<sup>b</sup> Institute of Low Temperature and Structure Research, Polish Academy of Sciences, Okólna 2, 50-422, Wrocław, Poland.

<sup>c</sup> TEMA, Mechanical Engineering Department, University of Aveiro, 3810-193 Aveiro, Portugal.

Table S2 Geometric details of the B-F... $\pi$  intermolecular interactions ( $\text{\AA}$ ,  $^\circ$ ).

| [4PyAla][BF <sub>4</sub> ] | Y-X...Cg                 | X...Cg   | Y...Cg   | $\gamma$ | Y-X...Cg | Y-X, $\pi$ |
|----------------------------|--------------------------|----------|----------|----------|----------|------------|
|                            | B1-F3...Cg <sup>ix</sup> | 3.030(4) | 4.117(6) | 8.04     | 133.6(3) | 39.44      |

Symmetry code: (ix) x, y, -1+z. Cg is the centroid of the pyridine ring;  
 $\gamma$  - angle between Cg...X vector and ring normal;  
Y-X,  $\pi$  - angle of the Y...X bond  
with the  $\pi$  - plane (i.e. Perpendicular =  $0^\circ$ , Parallel =  $0^\circ$ ). height

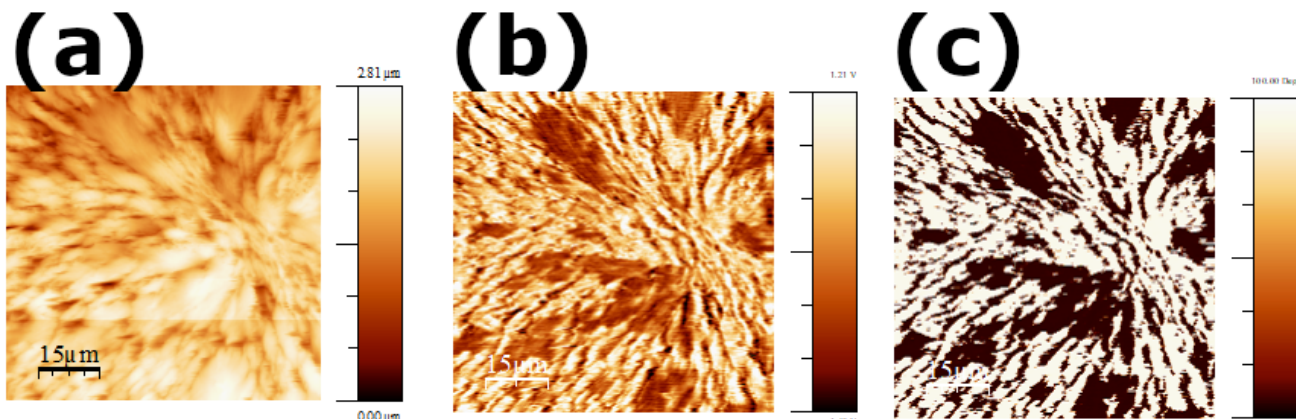

Fig. S2 The images recorded on PFM scan (a) Topography; (b) PFM,  $A \cdot \cos(\Phi)$ ; (c) PFM,  $\Phi$ .  $A$  and  $\Phi$  stand for amplitude and phase, respectively

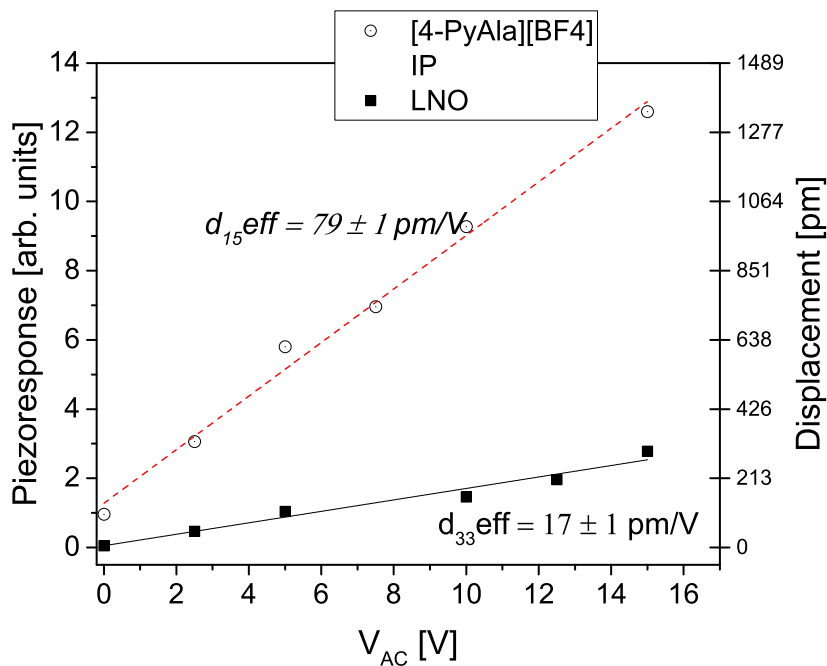

Fig. S3 Driving voltage dependence of in-plane piezoresponse of LNO and [4PyAla][BF<sub>4</sub>].
